# Supplementary material for: Generative AI and the future of higher education: a threat to academic integrity or reformation? Evidence from multicultural perspectives
Source: Springer Nature journal article supplement (doi:10.1186/s41239-024-00453-6), 2024-03-25
Supplement: MOESM1 [file 26917064]

Table S1. Country scores on cultural dimensions

| S/N | Countries | PDI | IDV | MAS | UAI | LTO | IVR |
| --- | --- | --- | --- | --- | --- | --- | --- |
| 1 | Algeria | 80 | 35 | 35 | 70 | 26 | 32 |
| 2 | Angola | 83 | 18 | 20 | 60 | 15 | 83 |
| 3 | Argentina | 49 | 46 | 56 | 86 | 20 | 62 |
| 4 | Armenia | 85 | 22 | 50 | 88 | 61 | 25 |
| 5 | Australia | 38 | 90 | 61 | 51 | 21 | 71 |
| 6 | Austria | 11 | 55 | 79 | 70 | 60 | 63 |
| 7 | Bangladesh | 80 | 20 | 55 | 60 | 47 | 20 |
| 8 | Belgium | 65 | 75 | 54 | 94 | 82 | 57 |
| 9 | Belarus | 95 | 25 | 20 | 95 | 81 | 15 |
| 10 | Brazil | 69 | 38 | 49 | 76 | 44 | 59 |
| 11 | Burkina Faso | 70 | 15 | 50 | 55 | 27 | 18 |
| 12 | Bulgaria | 70 | 30 | 40 | 85 | 69 | 16 |
| 13 | Canada | 39 | 80 | 52 | 48 | 36 | 68 |
| 14 | Cote d’Ivoire | NA | NA | NA | NA | NA | NA |
| 15 | Chile | 63 | 23 | 28 | 86 | 31 | 68 |
| 16 | China | 80 | 20 | 66 | 30 | 87 | 24 |
| 17 | Croatia | 73 | 33 | 40 | 80 | 58 | 33 |
| 18 | Cyprus | NA | NA | NA | NA | NA | NA |
| 19 | Czech Republic | 57 | 58 | 57 | 74 | 70 | 29 |
| 20 | Denmark | 18 | 74 | 16 | 23 | 35 | 70 |
| 21 | Egypt | 80 | 37 | 55 | 55 | 42 | 0 |
| 22 | Finland | 33 | 63 | 26 | 59 | 38 | 57 |
| 23 | France | 68 | 71 | 43 | 86 | 63 | 48 |
| 24 | Germany | 35 | 67 | 66 | 65 | 83 | 40 |
| 25 | Ghana | 80 | 15 | 40 | 65 | 4 | 72 |
| 26 | Greece | 60 | 35 | 57 | 100 | 45 | 50 |
| 27 | Iceland | 30 | 60 | 10 | 50 | 28 | 67 |
| 28 | Iran | 58 | 41 | 43 | 59 | 14 | 40 |
| 29 | Ireland | 28 | 70 | 68 | 35 | 24 | 65 |
| 30 | India | 77 | 48 | 56 | 40 | 51 | 26 |
| 31 | Italy | 50 | 76 | 70 | 75 | 61 | 30 |
| 32 | Indonesia | 78 | 14 | 46 | 48 | 62 | 38 |
| 33 | Japan | 54 | 46 | 95 | 92 | 88 | 42 |
| 34 | Jordan | 70 | 30 | 45 | 65 | 16 | 43 |
| 35 | Kazakhstan | 88 | 20 | 50 | 88 | 85 | 22 |
| 36 | Kenya | 70 | 25 | 60 | 50 | -1 | -1 |
| 37 | Kuwait | 90 | 25 | 40 | 80 | -1 | -1 |
| 38 | Malaysia | 100 | 26 | 50 | 36 | 41 | 57 |
| 39 | Mexico | 81 | 30 | 69 | 82 | 24 | 97 |
| 40 | Morocco | 70 | 46 | 53 | 68 | 14 | 25 |
| 41 | Netherlands | 38 | 80 | 14 | 53 | 67 | 68 |
| 42 | New Zealand | 22 | 79 | 58 | 49 | 33 | 75 |
| 43 | Nigeria | 80 | 30 | 60 | 55 | 13 | 84 |
| 44 | Nepal | 65 | 30 | 40 | 40 | -1 | -1 |
| 45 | Norway | 31 | 69 | 8 | 50 | 35 | 55 |
| 46 | Pakistan | 55 | 14 | 50 | 70 | 50 | 0 |
| 47 | Philippines | 94 | 32 | 64 | 44 | 27 | 42 |
| 48 | Romania | 90 | 30 | 42 | 90 | 52 | 20 |
| 49 | Russia | 93 | 39 | 36 | 95 | 81 | 20 |
| 50 | Saudi Arabia | 72 | 48 | 43 | 64 | 27 | 14 |
| 51 | Singapore | 74 | 20 | 48 | 8 | 72 | 46 |
| 52 | South Africa | 49 | 65 | 63 | 49 | 34 | 63 |
| 53 | South Africa | 60 | 18 | 39 | 85 | 100 | 29 |
| 54 | Spain | 57 | 51 | 42 | 86 | 48 | 44 |
| 55 | Sweden | 31 | 71 | 5 | 29 | 53 | 78 |
| 56 | Switzerland | 34 | 68 | 70 | 58 | 74 | 66 |
| 57 | Tanzania | 70 | 25 | 40 | 50 | 34 | 38 |
| 58 | Thailand | 64 | 20 | 4 | 64 | 32 | 45 |
| 59 | Turkey | 66 | 37 | 45 | 85 | 46 | 49 |
| 60 | Uganda | NA | NA | NA | NA | NA | NA |
| 61 | Ukraine | 92 | 25 | 27 | 95 | 86 | 14 |
| 62 | UK | 35 | 89 | 66 | 35 | 51 | 69 |
| 63 | USA | 40 | 91 | 62 | 46 | 26 | 68 |
| 64 | Zambia | 60 | 35 | 40 | 50 | 30 | 42 |
| 65 | Oman | NA | NA | NA | NA | NA | NA |
| 66 | Rwanda | NA | NA | NA | NA | NA | NA |
| 67 | Sudan | NA | NA | NA | NA | NA | NA |
| 68 | Gabon | NA | NA | NA | NA | NA | NA |
| 69 | Congo | NA | NA | NA | NA | NA | NA |
| 70 | Niger | NA | NA | NA | NA | NA | NA |
| 71 | Benin | NA | NA | NA | NA | NA | NA |
| 72 | Gambia | NA | NA | NA | NA | NA | NA |
| 73 | Cameroon | NA | NA | NA | NA | NA | NA |
| 74 | Afghanistan | NA | NA | NA | NA | NA | NA |
| 75 | Mali | NA | NA | NA | NA | NA | NA |
| 76 | Botswana | NA | NA | NA | NA | NA | NA |

PDI, Power Distance; IDV, Individualism; MAS, Masculinity; UAI, Uncertainty Avoidance; LTO, Long-Term Orientation; IVR, Indulgence

A negative value indicates no score on dimension

NA, not available

**Multinational Survey on Generative Artificial Intelligence (GenAI)**

The impact of Artificial Intelligence (AI) on education was a major concern at the start of the 2023 academic year. The launch of ChatGPT by OpenAI in November 2022 resulted in the education sector reacting to reports of its ability to pass medical and MBA exams. The issue of potential cheating by students remains a topic of ongoing discussion.

This is a multinational survey seeking to collect your opinion concerning the potential of Generative AI tools (henceforth referred to as GenAI Tools) in higher education. The survey consists of seven sections and a total of 22 questions. You may require an approximate 10-minute time to complete the survey. It should be noted that there are no right or wrong answers, and therefore, your opinions are highly respected. Participation is voluntary. Therefore, there are no compulsory questions. You can skip any question you deem fit.

Please note that only students and lecturers from higher educational institutions are eligible for participation. Your opinion should be self-generated and independent. We understand and appreciate your privacy. Therefore, we assure you that your response will be used for research purposes only. You may wish to opt out at any time during the survey completion.

For inquiries and concerns, contact the principal investigator using the email address below:

(Email removed for review purposes).

In the meantime, we would like you to provide your consent, indicating your agreement to participate in the survey.

Yes, I consent to take part in the survey ( )

No, I do not consent to take part in the survey ( )

**Section A: Demography**

Q1. What is your current academic status?

1. Student ( )
2. Lecturer ( )

Q2.* You indicated that you are a student. Which educational level best describes your current academic status?

1. Currently undergoing undergraduate program or equivalent
2. Currently undergoing a postgraduate program

Q3.* You indicated that you are a lecturer. Which educational qualification best describes your current academic status?

1. Degree holder or equivalent
2. Masters holder or equivalent
3. PhD holder or equivalent

Q4. What is your gender category?

1. Male
2. Female
3. Non-binary/third gender
4. Prefer not to say

Q5.+ What is your country of origin? (Select from dropdown menu)

Q6. Which category best describes your current residential location?

1. Major city
2. Rural areas
3. Regional location

**Section B: Awareness and use of GenAI tools**

Q7. Are you aware of the existence of GenAI technologies such as ChatGPT?

1. Yes
2. No
3. Unsure

Q8.* Have you ever (in any capacity) used GenAI tool?

1. Yes
2. No
3. Unsure

Q9.* On a scale of 1-4, rate your familiarity with the following GenAI tools.

(Not at all familiar; Somewhat unfamiliar; Somewhat familiar; Highly familiar)

1. AlphaCode
2. DALL-E
3. ChatGPT
4. MidJourney
5. Bard
6. ChatSonic
7. YouChat
8. JukeBox
9. GPT-4
10. Stable Diffusion
11. Claude
12. Synthesia
13. GrammerlyGo

Q10. On a scale of 1-5, how likely are you to use GenAI in the future?

1. Very unlikely
2. Unlikely
3. Not sure
4. Likely
5. Very likely

Q11.* If you have used or would consider using Generative AI tools in the future, what purpose do you intend or have used the tools for? (Select all that apply)

1. Information search
2. Self-learning
3. Conversation/general chats
4. Content generation (e.g., coding, research writing, short stories, poetry, etc.)
5. Fun or playing around with tools
6. Assignments
7. Paraphrasing lines of texts
8. Others

**Section C: Plagiarism and cheating**

Q12.* Have you ever used Generative AI tools to plagiarize on your assignments or research?

1. Yes, but would not in the future
2. Yes, and would again in the future
3. No, and would not in the future
4. No, but would in the future

Q13. Do you consider using GenAI tools for students' assignments or teachers’ research cheating?

|  | Yes | No | Unsure |
| --- | --- | --- | --- |
| For students’ assignment or research |  |  |  |
| For teachers’ research and other academic works |  |  |  |

Q14.* Any reason to justify your response?

**Section D: Skills and competence in using GenAI**

Q15.* On a scale of 1-4, rate your skills/ability levels in using GenAI tools to generate information or content.

1. Not at all skilled
2. Not very skilled
3. Somewhat skilled
4. Very skilled

Q16.* Do you often verify the accuracy of information generated by GenAI tools before usage?

1. Yes
2. No

Q17. How confident are you in being able to tell when something is AI-generated?

1. Not at all confident
2. Not very confident
3. Somewhat confident
4. Very confident

**Section E: Perceived benefits and concerns of GenAI**

Q18. On a scale of 1-5, rate your agreement on the following potential educational benefits of Generative AI tools.

(Strongly disagree; Disagree; Neutral; Somewhat agree; Strongly agree)

|  | Items | SD | D | N | A | SA |
| --- | --- | --- | --- | --- | --- | --- |
| 1 | Generative AI tools can respond to questions easily |  |  |  |  |  |
| 2 | They provide personalized and immediate learning support |  |  |  |  |  |
| 3 | They provide a starting point and brainstorming support |  |  |  |  |  |
| 4 | They facilitate literature search and summarized reading |  |  |  |  |  |
| 5 | They promote creativity and critical thinking skills |  |  |  |  |  |
| 6 | They help in problem-solving that is beyond the scope of the teacher |  |  |  |  |  |
| 7 | They facilitate knowledge acquisition and support writing tasks such as codes, essays, poems, and scripts. |  |  |  |  |  |
| 8 | They have the potential to reform education |  |  |  |  |  |
| 9 | They promote equity and access to education |  |  |  |  |  |

Q19. On a scale of 1-5, rate your agreement on the following concerns regarding the use of Generative AI tools in education.

|  | Items | SD | D | N | A | SA |
| --- | --- | --- | --- | --- | --- | --- |
| 1 | Generative AI tools can generate output that is factually inaccurate |  |  |  |  |  |
| 2 | They can generate output that is out of context or inappropriate |  |  |  |  |  |
| 3 | They can exhibit biases and unfairness in their output |  |  |  |  |  |
| 4 | They rely too heavily on online statistics, which can limit their usefulness in certain contexts |  |  |  |  |  |
| 5 | They have limited emotional intelligence and empathy, which can lead to output that is insensitive or inappropriate |  |  |  |  |  |
| 6 | They are too strong, so they may collect our personal information |  |  |  |  |  |
| 7 | They promote cheating and plagiarism without being easily detected |  |  |  |  |  |
| 8 | There is over-reliance on AI tools, and this may hinder students' and teachers' growth, skills, and intellectual development over time |  |  |  |  |  |
| 9 | Knowledge of Generative AI tools is limited as they cannot provide answers to every question. |  |  |  |  |  |
| 10 | Generative AI poses threats to academic integrity. |  |  |  |  |  |

Q20. Do you think that it is important for students and teachers to develop skills to use GenAI tools effectively?

|  | Not important | Somewhat important | Very important | Not sure |
| --- | --- | --- | --- | --- |
| Important for students? |  |  |  |  |
| Important for teachers? |  |  |  |  |

**Section F: Ethics and Regulations**

Q21. Do you think there should be educational policies regulating the use of GenAI in higher education?

1. Yes
2. No
3. Unsure

Q22.* What specific educational policies or regulations do you think should be enforced?
